# Supplementary material
Source: PubMed Central journal article supplement (PMC4932899)
Supplement: NIHMS778338-supplement-1.pdf [file NIHMS778338-supplement-1.pdf]

**Supplementary Figure 1**

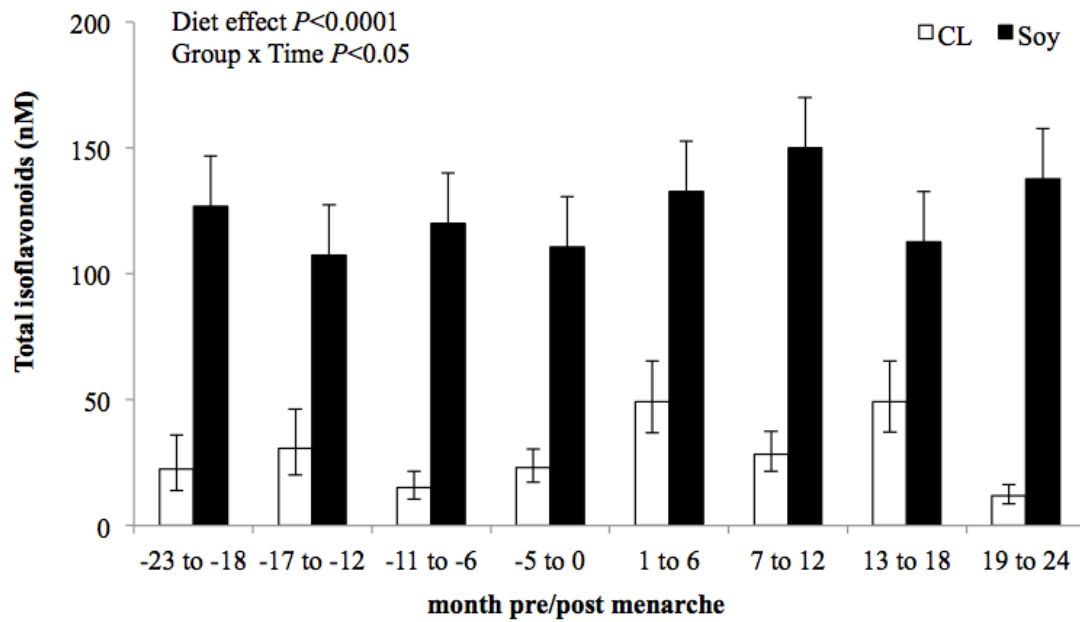

**Supplementary Figure 1.** Serum isoflavonoid concentrations across the pubertal transition. Levels of circulating total isoflavonoids (genistein + daidzein + equol) were significantly higher in soy-fed monkeys. Values represent LSMs for  $n=11-17$  monkeys/group (bars = SEM). Significant main effects and interactions are indicated in the panel.
