# Supplementary material
Source: PubMed Central journal article supplement (PMC4932899)
Supplement: NIHMS778338-supplement-2.pdf [file NIHMS778338-supplement-2.pdf]

## Supplementary Figure 2

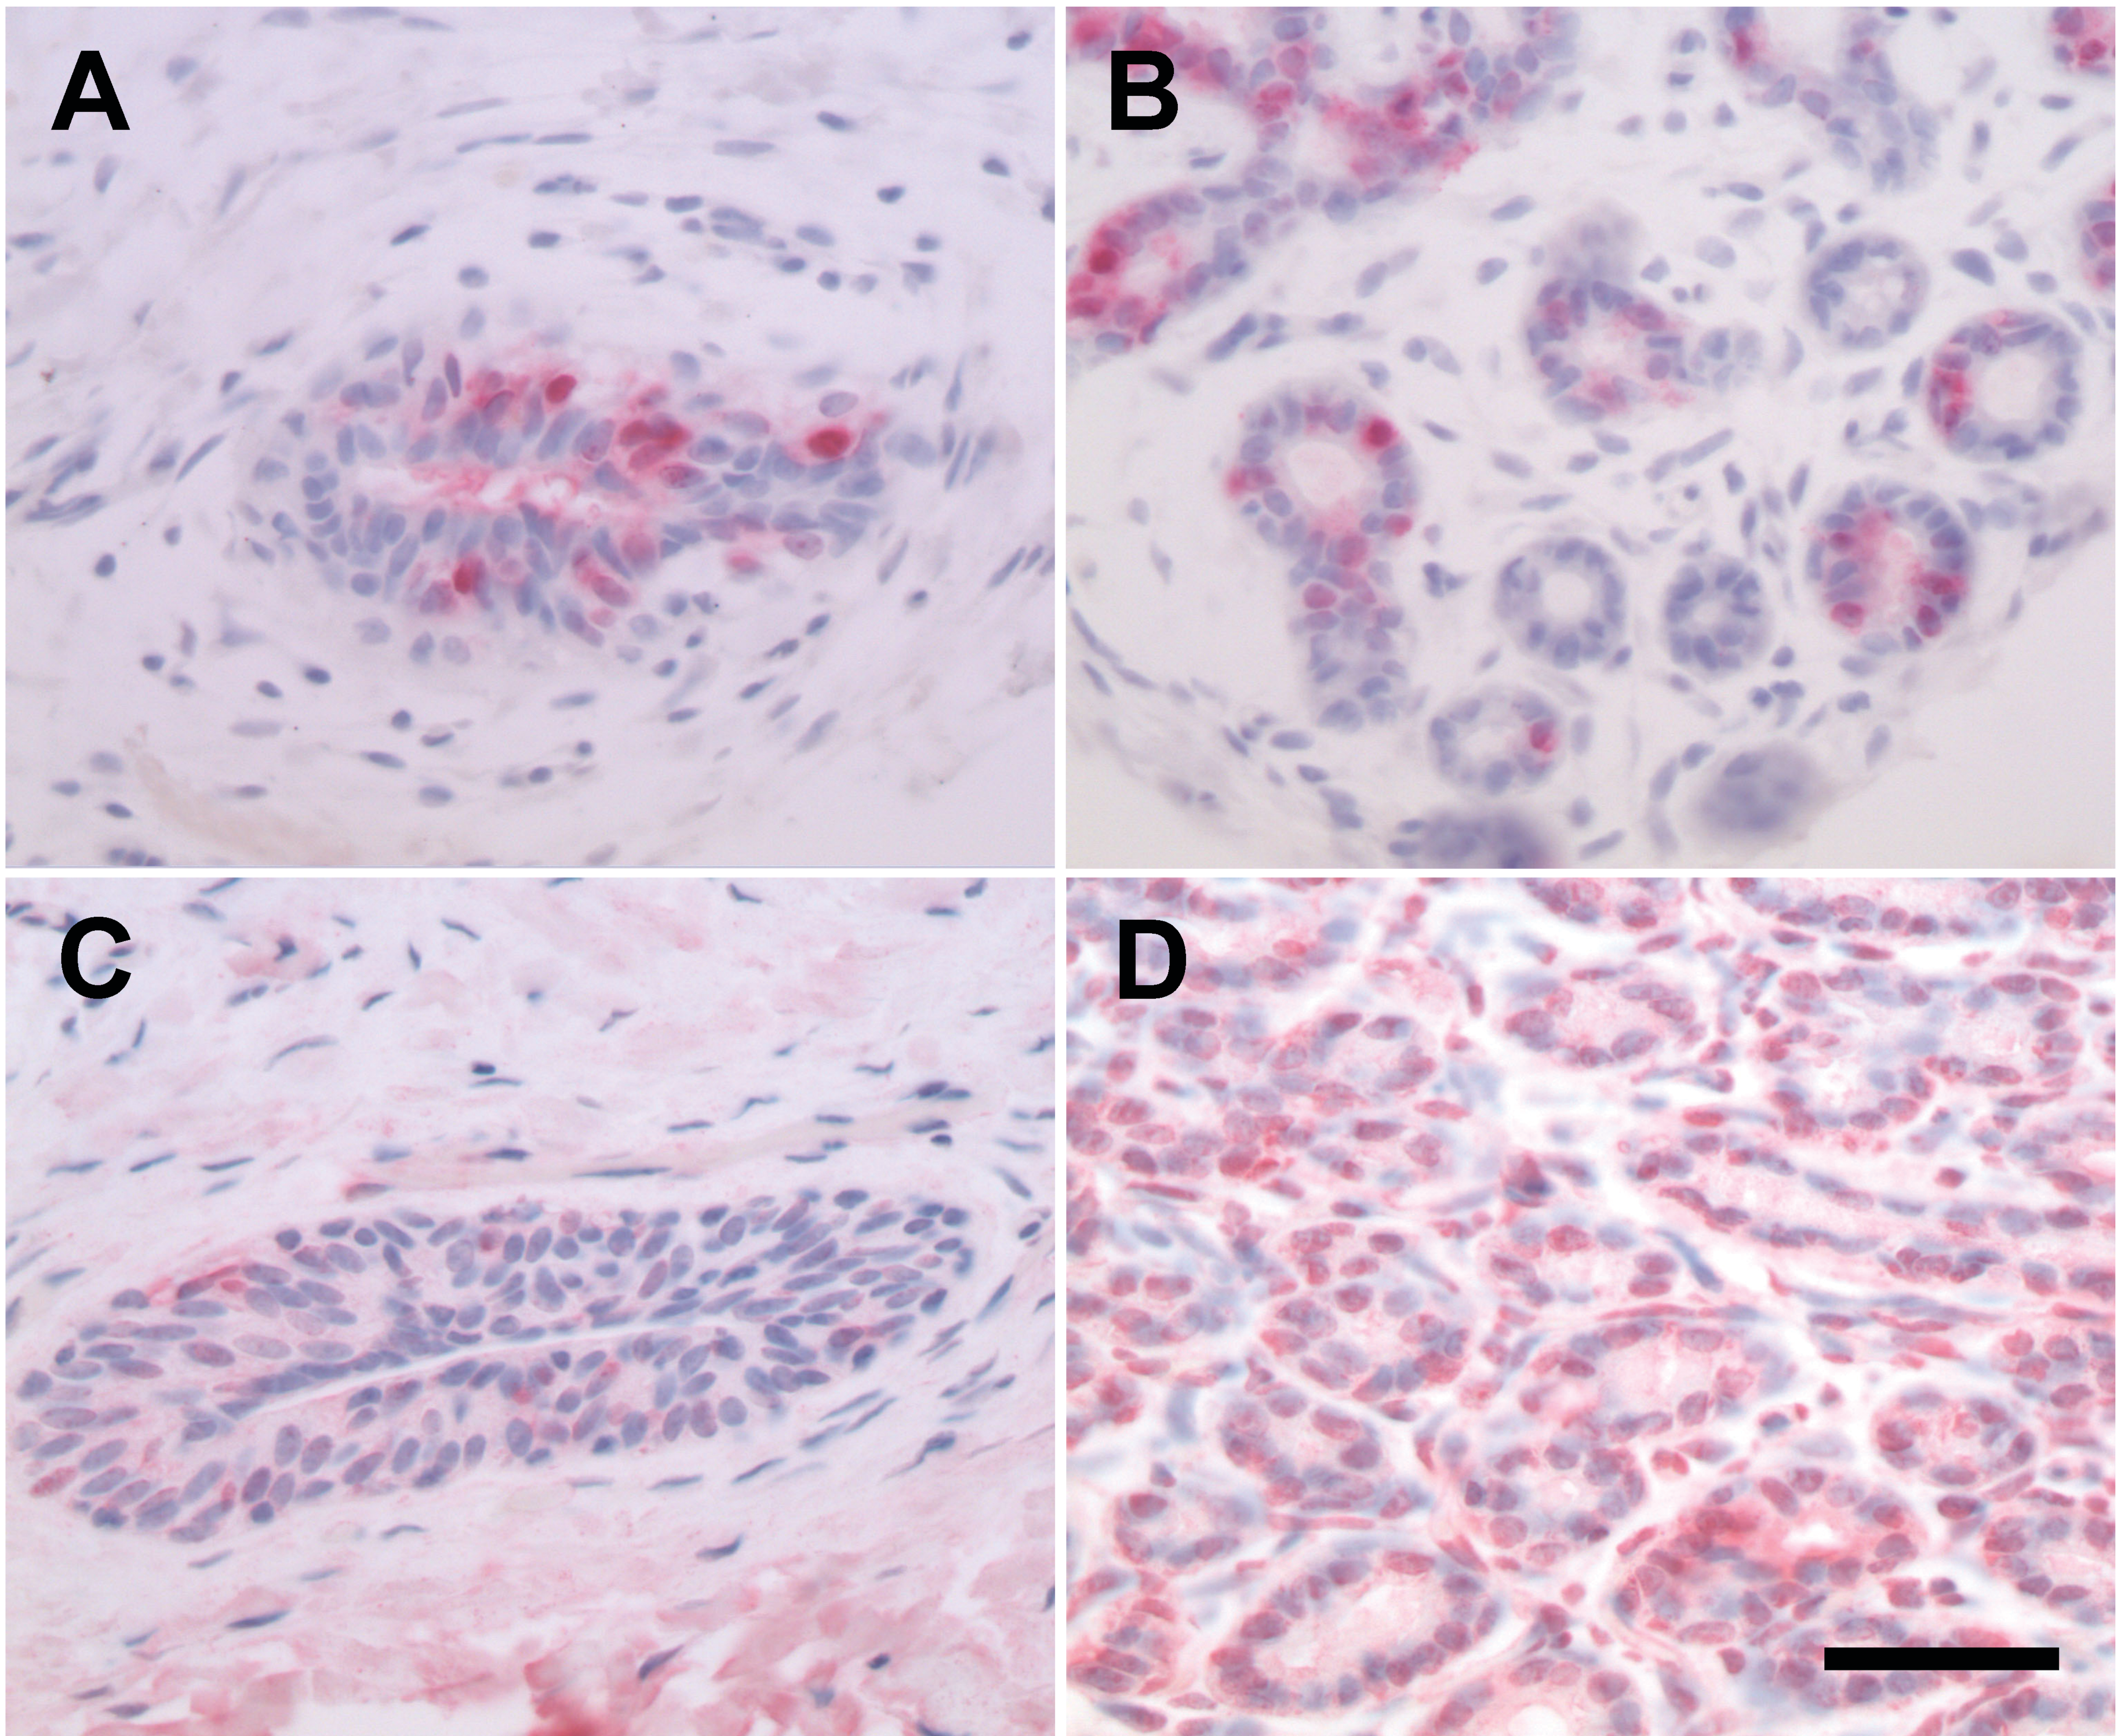

**Supplementary Figure 2.** Representative photomicrographs of ER $\alpha$  staining in a transitional duct from a prepubertal animal (A); ER $\alpha$  staining in post-pubertal, differentiated lobuloalveolar tissue (B); ER $\beta$  staining in prepubertal transitional duct (C); and ER $\beta$  staining in mature lobuloalveolar tissue (D). Bar = 50 microns.
