# Supplementary material
Source: PubMed Central journal article supplement (PMC4932899)
Supplement: NIHMS778338-supplement-3.pdf [file NIHMS778338-supplement-3.pdf]

### Supplementary Figure 3

#### A Gene expression change across adolescence:

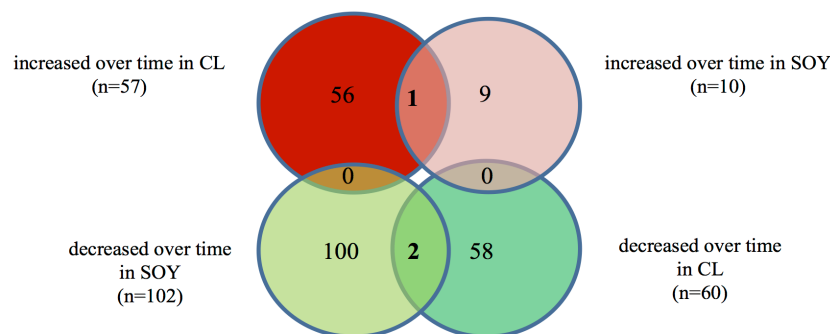

Venn diagram based on sets of genes filtered by Paired t-test: unadjusted  $P < 0.05$ ; Fold-change  $> 1.5$   
 $n = 4$  monkeys per diet group

#### B Top 10 differentially expressed genes:

|                               | at 7-12 months post-menarche (n=157 genes) | FC   | P-value | at 19-24 months post-menarche (n=190 genes) | FC   | P-value |
|-------------------------------|--------------------------------------------|------|---------|---------------------------------------------|------|---------|
| upregulated in SOY (vs. CL)   | <i>NBEAL2-like</i>                         | 6.74 | 0.041   | <i>LEP</i>                                  | 2.62 | 0.041   |
|                               | <i>TFF3-homolog</i>                        | 3.11 | 0.028   | <i>CA6-like</i>                             | 2.62 | 0.042   |
|                               | <i>ALDH9A1-like</i>                        | 2.79 | 0.049   | <i>MIR675</i>                               | 2.58 | 0.003   |
|                               | <i>CPA3</i>                                | 2.73 | 0.015   | <i>PPIA-like</i>                            | 2.38 | 0.001   |
|                               | <i>DPT</i>                                 | 2.40 | 0.034   | <i>STX3-like</i>                            | 2.27 | 0.017   |
| downregulated in SOY (vs. CL) | <i>RPLP2-like</i>                          | 1.99 | 0.040   | <i>CXCL9</i>                                | 4.38 | 0.006   |
|                               | <i>ANKRD62-like</i>                        | 1.99 | 0.027   | <i>CXCL10</i>                               | 2.88 | 0.034   |
|                               | <i>CAPN3</i>                               | 1.94 | 0.021   | <i>RTD1B</i>                                | 2.41 | 0.006   |
|                               | <i>FAM3B-like</i>                          | 1.83 | 0.006   | <i>DPPA2</i>                                | 2.33 | 0.019   |
|                               | <i>ZNF850</i>                              | 1.83 | 0.017   | <i>IGLV7-46</i>                             | 2.05 | 0.005   |

$n = 4$  monkeys per diet group

Filtered by  $FC > 1.5$ ; unadjusted  $P < 0.05$  (by empirical Bayes)

#### C Gene enrichment analysis:

|                                                         | Top-10 significantly enriched KEGG gene sets (FDR<0.05) |      |      |                            |      |      |
|---------------------------------------------------------|---------------------------------------------------------|------|------|----------------------------|------|------|
|                                                         | CL                                                      | Size | FDR  | SOY                        | Size | FDR  |
| Enriched among genes that were upregulated over time    | Olfactory transduction                                  | 128  | 0.00 | Ribosome                   | 60   | 0.01 |
|                                                         | Neuroactive ligand receptor interaction                 | 207  | 0.00 | Olfactory transduction     | 128  | 0.01 |
|                                                         | Autoimmune thyroid disease                              | 26   | 0.00 |                            |      |      |
|                                                         | Cytokine-cytokine receptor interaction                  | 212  | 0.00 |                            |      |      |
|                                                         | Intestinal immune network for IgA production            | 34   | 0.00 |                            |      |      |
| Enriched among genes that were down-regulated over time | Spliceosome                                             | 93   | 0.00 | ECM receptor interaction   | 70   | 0.00 |
|                                                         | Valine, leucine, isoleucine degradation                 | 28   | 0.00 | Focal adhesion             | 159  | 0.00 |
|                                                         | Huntington disease                                      | 126  | 0.00 | TGF-beta signaling pathway | 68   | 0.00 |
|                                                         | Insulin signaling pathway                               | 107  | 0.00 | Adherens junction          | 59   | 0.01 |
|                                                         | Arrhythmogenic right ventricular cardiomyopathy         | 59   | 0.00 |                            |      |      |

**Supplementary Figure 3.** Gene expression profile in the post-menarchal macaque breast by microarray. (A) Venn diagram showing number of genes that changed with time (i.e. between 7-12 months to 18-24 months after menarche) in the control (CL) and soy group (SOY), based on unadjusted  $P$ -values from a paired t-test in each diet group. (B) The list of top-10 genes that showed significant difference by dietary treatment using empirical Bayes statistics. (C) The top-10 significantly enriched KEGG pathways in CL and SOY groups across time. FC = fold-change; FDR=false discovery rate.
