# Supplementary material
Source: PubMed Central journal article supplement (PMC4932899)
Supplement: NIHMS778338-supplement-4.pdf [file NIHMS778338-supplement-4.pdf]

**Supplementary Table 1A.** Cynomolgus macaque and human primer probe sets used to generate custom Taqman-based assay for qRT-PCR.

| Gene           | Accession No. <sup>a</sup> | Species <sup>b</sup> |   | Primer/Probe Sequence (5' to 3') <sup>c</sup> |
|----------------|----------------------------|----------------------|---|-----------------------------------------------|
| <i>ESR1</i>    | DQ469336                   | Mf                   | F | TCACATGATCAACTGGGCAAAGA                       |
|                |                            |                      | R | AGAAGGTGGACCTGATCATGGA                        |
|                |                            |                      | P | CACAAAG <sub>cc</sub> TGGCACCC                |
| <i>ESR2</i>    | HQ702565                   | Mf                   | F | GTATCTCTGTGTCAAGGCCATGAT                      |
|                |                            |                      | R | CATCCTGGGTCGCTGTGA                            |
|                |                            |                      | P | CCTGCTCAATTCC <sub>aa</sub> TATGT             |
| <i>PGR-B*</i>  | -                          | Hs                   | F | GCCAGACCTCGGACACCTT                           |
|                |                            |                      | R | CAGGGCCGAGGGAAGAGTAG                          |
|                |                            |                      | P | CCTGAAGTTTCGGCCATACCTATCTCCCT                 |
| <i>TFF1</i>    | DQ464113                   | Mf                   | F | GTGCTTCCATCCTAATACCATCGA                      |
|                |                            |                      | R | GCAGATCCATGCAGAAGTGTCTAAA                     |
|                |                            |                      | P | TCCCTCCAGAA <sub>ga</sub> GGAGTGT             |
| <i>CYP19</i>   | DQ529980                   | Mf                   | F | CCCCAAACCAATGAATTTACTCTTG                     |
|                |                            |                      | R | GGCCCAAAGCCAAATGGTT                           |
|                |                            |                      | P | AAAGTACCTATAAGGAA <sub>ca</sub> TTCTT         |
| <i>HSD17B1</i> | DQ529983                   | Mf                   | F | CAGGCCTGGGCCTACTG                             |
|                |                            |                      | R | CGTTCACGTCCAGCACAGA                           |
|                |                            |                      | P | CCCACCGCCTCCAGC                               |
| <i>HSD17B2</i> | DQ529984                   | Mf                   | F | AAAGGAAGGCTGGTGAATGTCA                        |
|                |                            |                      | R | ATGCCAGCTTTGCCATTGG                           |
|                |                            |                      | P | CCCCT <sub>cc</sub> TCCCATGCTG                |
|                |                            |                      | P | ATGTT <sub>cc</sub> TGAGCTCTCG                |
| <i>STS</i>     | DQ529981                   | Mf                   | F | GGGATGCTGTTGAGGAAATGGA                        |
|                |                            |                      | R | CCAATCTCAGCTCATCTAGAAGGTT                     |
|                |                            |                      | P | ATCTGC <sub>cc</sub> CACACTCC                 |
| <i>SULT1E1</i> | DQ529982                   | Mf                   | F | GAGAGAACGGGCCAGGTT                            |
|                |                            |                      | R | CGAGAGGTGTCCTGGATCAG                          |
|                |                            |                      | P | ATGTT <sub>cc</sub> TGAGCTCTCG                |

| Gene           | Accession No. <sup>a</sup> | Species <sup>b</sup> | Primer/Probe Sequence (5' to 3') <sup>c</sup> |
|----------------|----------------------------|----------------------|-----------------------------------------------|
| <i>CYP11A1</i> | D17575                     | Mf                   | F CCACAGCCACCTCCAAGATC                        |
|                |                            |                      | R TGGCCGACATGGAGATTTCG                        |
|                |                            |                      | P CCTACTGATCATGCTTTT                          |
| <i>CYP11B1</i> | AB179009                   | Mf                   | F CCGCGCTGCAGTGG                              |
|                |                            |                      | R CACTCGAGCCTGCACATCA                         |
|                |                            |                      | P CTCCTCTTCATCA <del>gg</del> TATCC           |
| <i>CYP3A4</i>  | S53047                     | Mf                   | F CACACCTTTGCCTTTATTGGGAAAT                   |
|                |                            |                      | R AGCCCCACACTTTTCCATACTTTT                    |
|                |                            |                      | P <i>Caa</i> ACGTCCAAAAGCC                    |
| <i>GAPDH</i>   | DQ464111                   | Mf                   | F TGCCCTCAATGACCACTTTGTC                      |
|                |                            |                      | R ACCCTGTTGCTGTAGCCAAAT                       |
|                |                            |                      | P TCGTTGTCATA <del>cc</del> AGGAAAT           |
| <i>ACTB</i>    | DQ464112                   | Mf                   | F ACCCCAAGGCCAACCG                            |
|                |                            |                      | R CCTGGATGGCCACGTACATG                        |
|                |                            |                      | P AAGATGACCC <del>Aga</del> TCATG             |

<sup>a</sup> Genbank identification code or cited reference. <sup>a</sup>*Hs*, *Homo sapiens*; *Mf*, *Macaca fascicularis* (cynomolgus macaque). <sup>c</sup> Bold letters indicate differences between macaque and human sequences. Italicized lowercase of base pairs indicate exon boundaries. Underlined sequence represents an 8-base deletion in the HSD17B1 pseudogene. F, forward primer; R, reverse primer; P, probe. Asterisk (\*) indicates that the assay was based on that reported in Sakaguchi et al. *Gynecol Oncol*. 2004 May;93(2):394-9.

**Supplementary Table 1B.** Applied Biosystems (ABI) Taqman gene expression assays used in qRT-PCR

| Gene ID                 | NCBI Accession no. | Species <sup>a</sup> | ABI assay ID  |
|-------------------------|--------------------|----------------------|---------------|
| <i>PGR</i> <sup>b</sup> | XM_001095317.1     | <i>Mm</i>            | Rh02830094_m1 |
| <i>GREB1</i>            | XM_001089374.1     | <i>Mm</i>            | Rh02866842_m1 |

<sup>a</sup>*Mm*, *Macaca mulatta* (rhesus macaque). <sup>b</sup> PGR was used to generate PGR-A expression level; quantification of PGR-A was done by subtraction of PGR-B (custom assay) from PGR, as previously described in Sakaguchi et al. *Gynecol Oncol*. 2004 May;93(2):394-9.
