# Supplementary material
Source: PubMed Central journal article supplement (PMC4932899)
Supplement: NIHMS778338-supplement-5.pdf [file NIHMS778338-supplement-5.pdf]

**Supplementary Table 2.** Cynomolgus macaque primer sets (forward, F; reverse, R; and sequencing, S) for pyrosequencing assay.

| Gene         | Location <sup>a</sup>             | Identity <sup>b</sup> |                             | Sequence (5' to 3')           | CpG site |
|--------------|-----------------------------------|-----------------------|-----------------------------|-------------------------------|----------|
| <i>ESR1</i>  | Chr.4,<br>111263150-<br>111263332 | 100%                  | F                           | GGGATTGTTGTTTTGTTTTGATATTG    | 4        |
|              |                                   |                       | R                           | CTTCCCTAAACCACCTTTAAC         |          |
|              |                                   |                       | S                           | ATTGGTTTAAATATTATTTTAGGT      |          |
| <i>ESR2</i>  | Chr.7,<br>127316270-<br>127316468 | 99%                   | F                           | GTAGAGGGGAGTAGTGTTTGA         | 10       |
|              |                                   |                       | R                           | TAAACCCTACTACAAACCTCTTAAATCT  |          |
|              | Chr.7,<br>127316270-<br>127316465 | 99%                   | F                           | GTAGAGGGGAGTAGTGTTTGA         | 6        |
|              |                                   |                       | R                           | ACCCTACTACAAACCTCTTAAATCTAA   |          |
| <i>TFF1</i>  | Chr.3,<br>4300494-<br>4300654     | n/a                   | F                           | TTTTTGGGGATAGAAGGAAAGAGG      | 2        |
|              |                                   |                       | R                           | AAACTCATAAAACCCATTCCATCTACT   |          |
|              |                                   |                       | S                           | AGGAAAGAGGGAGGA               |          |
| <i>TFF1</i>  | Chr.3,<br>4300621-<br>4300785     | 96.7%                 | F                           | AGATTAGAGTAGATGGAATGGGTTTTA   | 3        |
|              |                                   |                       | R                           | AACCCTCCCACCAAATAAATACT       |          |
|              |                                   |                       | S                           | TTTTTTTTTTTTTTTTTTGTAAGGTT    |          |
| <i>TFF1</i>  | Chr.3,<br>4300623-<br>4300862     | 96.1%                 | F                           | ATTAGAGTAGATGGAATGGGTTTTA     | 2        |
|              |                                   |                       | R                           | AAATTCAAAAAATCCCTCTTATCC      |          |
|              |                                   |                       | S                           | GGTTTTTTAGATATGAGTAGG         |          |
| <i>PGR-A</i> | Chr.14,<br>99754110-<br>99754305  | 96.5%                 | F                           | GGGGTTTAGAATTGTTGTTTTTAGTATTT | 7        |
|              |                                   |                       | R                           | AACCAAACCTCCAACACCTTACCT      |          |
| <i>PGR-A</i> | Chr.14,<br>99754243-<br>99754487  | 95.5%                 | F                           | AGAGTAGTTAGTTTAGGGAGATAGGTAT  | 10       |
|              |                                   |                       | R                           | CCCCTCCTCCTCCCTTTT            |          |
|              |                                   |                       | S                           | GTTTAGGGAGATAGGTATG           |          |
| <i>PGR-B</i> | Chr.14,<br>99755157-<br>99755327  | 98.3%                 | F                           | AGTGATAGTTGTGGATTGGTTAGAT     | 3        |
|              |                                   |                       | R                           | CCATCCCAAAAACCTACTAT          |          |
|              |                                   |                       | S                           | TGGATTGGTTAGATAGTTT           |          |
| <i>GREB1</i> | Chr.13,<br>11603662-<br>11603810  | 97.3%                 | F                           | TAGGGTTTGTTTTTGAAGGGTAGA      | 2        |
|              |                                   |                       | R                           | ATAACCCAATTACCACACTTTTT       |          |
|              |                                   |                       | S                           | TGAAGGGTAGAGTTGATA            |          |
|              | Chr.13,<br>11603796-<br>11603960  | 96.4%                 | F                           | TGGTAATTGGGTTATTTTGATTTAGAAGT | 2        |
| R            |                                   |                       | ACCAAACATACTACTACAAATATTTCA |                               |          |
|              |                                   |                       | S                           | TTTGATTTAGAAGTAATTAATA        |          |

<sup>a</sup> Genome coordinates based on UCSC Rhesus Genome Jan. 2006 (MGSC Merged\_1.0/rheMac2).

<sup>b</sup> Sequence identity between macaque and human DNA for each amplicon.
