# Supplementary material
Source: PubMed Central journal article supplement (PMC4932899)
Supplement: NIHMS778338-supplement-6.pdf [file NIHMS778338-supplement-6.pdf]

**Supplementary Table 3.** Immunolocalization of Steroidogenic Enzymes in the Mammary Gland

| Enzyme  | Menarche Status | Immunostaining                                                                                                      |                                                                                                                                                                                                                                                                                                                                            |
|---------|-----------------|---------------------------------------------------------------------------------------------------------------------|--------------------------------------------------------------------------------------------------------------------------------------------------------------------------------------------------------------------------------------------------------------------------------------------------------------------------------------------|
|         |                 | Epithelium (ducts and acini)                                                                                        | Stroma                                                                                                                                                                                                                                                                                                                                     |
| EST     | Pre-            | Cytoplasmic<br>Heterogeneous (10-50% of cells)<br>Moderate intensity                                                | Cytoplasmic<br>Diffuse<br>Moderate intensity                                                                                                                                                                                                                                                                                               |
|         | Post-           | Cytoplasmic<br>Heterogeneous (10-50% of cells)<br>Occasional nuclear staining (<20% of cells)<br>Moderate intensity | Cytoplasmic<br>Diffuse<br>Weak intensity                                                                                                                                                                                                                                                                                                   |
| STS     | Pre-            | Positive only in 8/15 animals<br>Cytoplasmic<br>Heterogeneous (up to 75% cells)<br>Weak to moderate intensity       | Negative                                                                                                                                                                                                                                                                                                                                   |
|         | Post-           | Positive only in 3/15 animals<br>Cytoplasmic<br>Weak intensity                                                      | Negative                                                                                                                                                                                                                                                                                                                                   |
| HSD17B1 | Pre-            | Cytoplasmic<br>Heterogeneous (<20% of cells)<br>Weak intensity                                                      | Cytoplasmic, heterogeneous with weak intensity in overall stromal cells<br><br>Cytoplasmic, occasionally of strong intensity but heterogeneous in myoepithelial cells and stroma immediately surrounding lobules and ducts<br><br>Cytoplasmic, occasionally of weak to moderate intensity in endothelial cells<br><br>Absent in adipocytes |
|         | Post-           | Similar to pre-menarche                                                                                             | Similar to pre-menarche                                                                                                                                                                                                                                                                                                                    |
| HSD17B2 | Pre-            | Cytoplasmic<br>Heterogeneous (<10% cells)<br>Weak intensity                                                         | Cytoplasmic<br>Diffuse<br>Strong intensity<br><br>Cytoplasmic, heterogeneous with moderate intensity in endothelial cells                                                                                                                                                                                                                  |
|         | Post-           | Similar to pre-menarche                                                                                             | Similar to pre-menarche                                                                                                                                                                                                                                                                                                                    |
